# Supplementary material for: Intra- and Inter-Annual Growth Patterns of a Mixed Pine-Oak Forest under Mediterranean Climate
Source: MDPI journal article supplement (doi:10.3390/f12121746), 2021-12-10

## Supplementary information

**Table S1.** Characteristics of the climate stations available near the study area.

| Weather station     | Latitude (N) | Longitude (E) | Elevation<br>(m asl) | Time-span | Frequency |
|---------------------|--------------|---------------|----------------------|-----------|-----------|
| Tortosa             | 40°48'45"    | 0°31'16"      | 44                   | 1905-2015 | Daily     |
| Reus                | 41°09'18"    | 1°06'31"      | 125                  | 1952-2015 | Daily     |
| Montblanc           | 41°22'35"    | 1°09'50"      | 340                  | 1974-1991 | Monthly   |
| Monastir Poblet     | 41°22'51"    | 1°04'57"      | 510                  | 1974-2014 | Daily     |
| Riudabella          | 41° 22' 21"  | 1° 02' 34"    | 590                  | 1995-2005 | Daily     |
| Prades              | 41°18'34"    | 0°59'16"      | 969                  | 1995-2014 | Daily     |
| Tossal Baltasana    | 41° 19' 34"  | 1° 00' 15"    | 1203                 | 2010-2014 | Monthly   |
| Tillar (study site) | 41°20'0.87"  | 1°0'46.12"    | 929                  |           |           |

**Table S2.** Biometric tree characteristics. N= 16 and 9 Scots pines and pubescent oaks, respectively.

| Species       | DBH (cm)      | Height (m)   | Sapwood (cm) |
|---------------|---------------|--------------|--------------|
| Scots pine    | 21.90 ± 11.19 | 13.50 ± 3.40 | 5.48 ± 1.71  |
| Pubescent oak | 13.89 ± 3.79  | 7.72 ± 2.25  | 2.31 ± 0.55  |

**Figure S1.** Annual mean temperature and total sum of precipitation for the period 1901-2014. Linear regression models were fitted for the studied period 1950 – 2014.

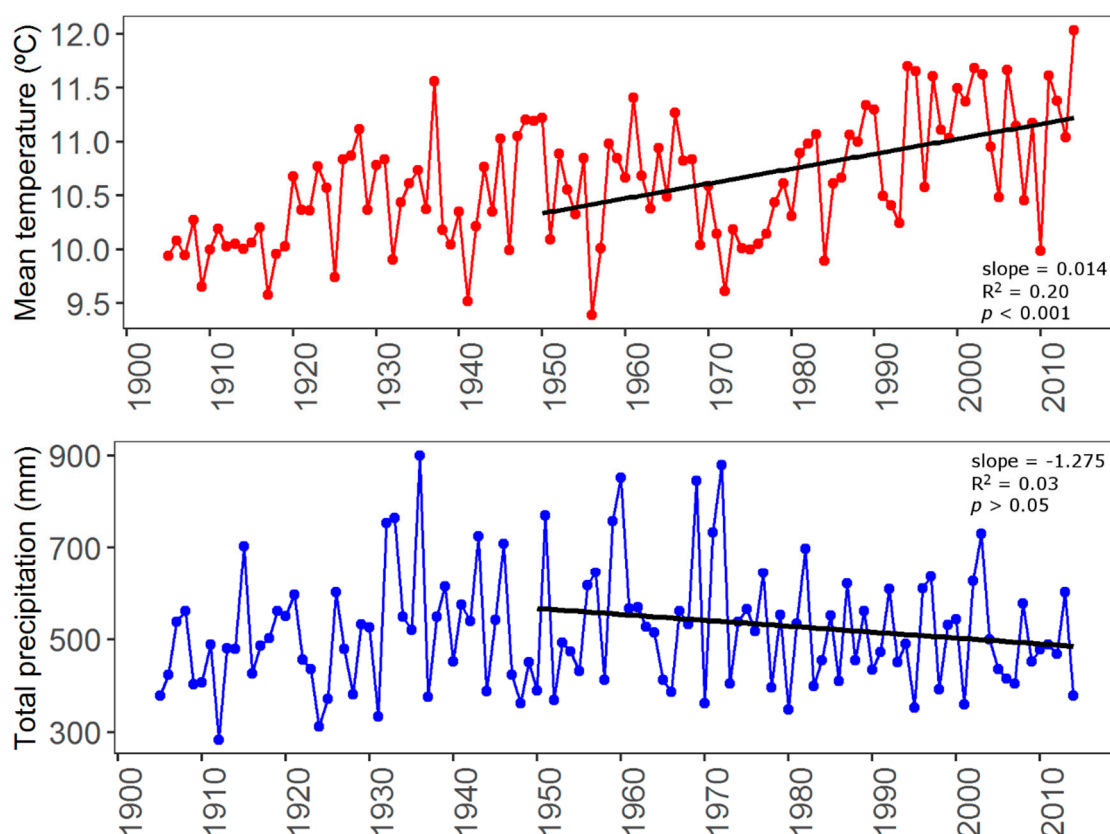

**Figure S2.** Individual intra-annual growth rates of Scots pine and pubescent oak for the four consecutive growing periods 1997 – 2000. Upper and lower panels correspond to Scots pine and pubescent oak growth rates, respectively.

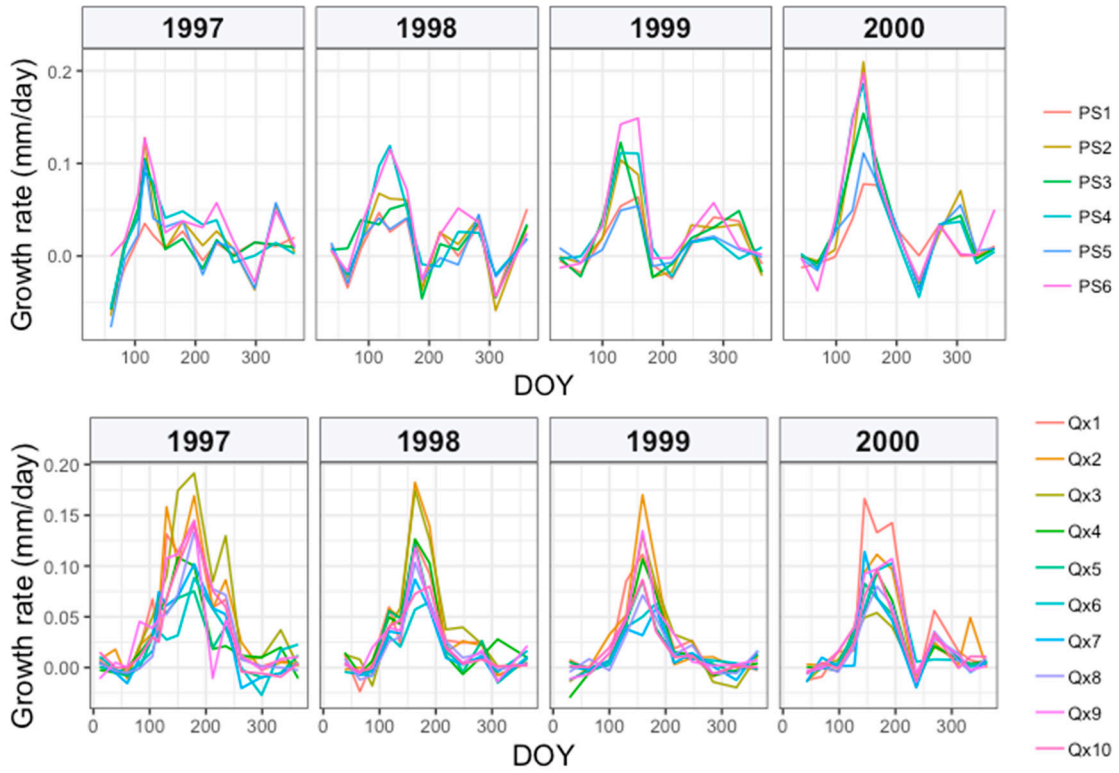

Supplement: s1 [file s1]
